# Supplementary material for: DNA Methylation of Imprinted Genes KCNQ1, KCNQ1OT1, and PHLDA2 in Peripheral Blood Is Associated with the Risk of Breast Cancer
Source: MDPI journal article supplement (doi:10.3390/cancers14112652), 2022-05-27
Supplement: s1 [file s1]

### Supplementary Materials and Methods

The DNA methylation levels of imprinted genes in the peripheral blood leukocyte samples were detected by MethylTarget™ (Genesky Biotechnologies Inc., Shanghai, China), a next-generation sequencing-based multiple Targeted CpG methylation analysis method. A multiplex polymerase chain reaction (PCR) was performed with optimized combination of primers. A 20 µl PCR reaction mixture was prepared for each reaction, which included 10 × reaction buffer (Takara Bio, Otsu, Japan), 25mM of Mg<sup>2+</sup>, 2.5mM of dNTP, 1µM of each primer, 5U/µL HotStarTaq polymerase (Takara) and 1 µL of template DNA. PCR amplicons were diluted and amplified using indexed primers. The cycling program was 95°C for 2 minutes; 11 cycles of 95°C for 20 seconds, 62°C for 40 seconds with a decreasing temperature step of 0.5°C per cycle, 72°C for 1 minute; then followed by 24 cycles of 95°C for 20 seconds, 62°C for 30 seconds, 72°C for 1 minute; and, finally, 72°C for 1 minute.

Libraries from different samples were quantified, pooled together, and used for sequencing on the MiSeq platform (Illumina, Inc., San Diego, CA, USA). Sequencing was performed with a 2 × 300 bp paired-end mode. Quality control of sequencing reads was performed by FastQC (<http://www.bioinformatics.babraham.ac.uk/projects/fastqc/>). Assembling the filtered R1 and R2 reads were conducted with FLASH (Fast length adjustment of short reads to improve genome assemblies) (<http://www.cbcb.umd.edu/software/flash>). FastX was used to process fastq files to obtain the fa format sequence ([http://hannonlab.cshl.edu/fastx\\_toolkit/index.html](http://hannonlab.cshl.edu/fastx_toolkit/index.html)). All reads in the fa and reference sequences of target region were compared by BLAT (<http://genome.ucsc.edu/FAQ/FAQblat.html>). Reads that could cover 90% of its target sequences or with 90% bases that could completely cover target sequences, which were classified as effective reads.

**Table S1.** Main characteristics of samples from TCGA, GEO and validation datasets.

| Datasets      | Sample type                    | Assay                              | Groups                 | No. of samples | Mean age     |
|---------------|--------------------------------|------------------------------------|------------------------|----------------|--------------|
| GSE74738      | Placental<br>chorionic villi   | Illumina 450K Assay                | Diandric triploid      | 5              | 11.8 (weeks) |
|               |                                |                                    | Digynic triploid       | 5              | 9.4 (weeks)  |
| TCGA-BC       | Tissue                         | Illumina 450K Assay                | BC tissue              | 782            | 58.0 (years) |
|               |                                |                                    | Normal adjacent breast | 96             | 57.6 (years) |
| GSE51032      | Peripheral blood<br>leukocytes | Illumina 450K Assay                | BC patients            | 233            | 52.4 (years) |
|               |                                |                                    | Control                | 340            | 52.6 (years) |
| Inhouse study | Peripheral blood<br>leukocytes | Targeted methylation<br>sequencing | BC patients            | 514            | 52.0 (years) |
|               |                                |                                    | Control                | 534            | 52.1 (years) |

TCGA, The Cancer Genome Atlas; GEO, Gene Expression Omnibus.

**Table S2.** Sequences of primers and products of targeted sequencing array.

| Gene <sup>a</sup> | mRNA      | Primer sequence                     | Primer location        | Product information    |                   |        |     |
|-------------------|-----------|-------------------------------------|------------------------|------------------------|-------------------|--------|-----|
|                   |           |                                     |                        | Genomic location       | Product size (bp) | Strand | CpG |
| <i>CDKN1C</i>     | NM_000076 | F-GTATTTGGTTTGTGGAAYGTTAGTTYGTTG    | Chr11: 2906991-2907022 | Chr11: 2906991-2907276 | 286               | +      | 43  |
|                   |           | R-CCCCCTTCCCCTACTACAAC              | Chr11: 2907257-2907276 |                        |                   |        |     |
| <i>KCNQ1OT1</i>   | NR_002728 | F-GGGYGGTAGTAGGGGAAGGTTTG           | Chr11: 2721298-2721320 | Chr11: 2721298-2721469 | 172               | +      | 11  |
|                   |           | R-CCACCTCACACCCAACCA                | Chr11: 2721452-2721469 |                        |                   |        |     |
| <i>KCNQ1OT1</i>   | NR_002728 | F-GATATGTTAGGTTATTTATTTGGTAAAGGGTAG | Chr11: 2721919-2721951 | Chr11: 2721919-2722151 | 233               | +      | 22  |
|                   |           | R-AAAAAAAGTTTATAACCCAAAGTTTATCC     | Chr11: 2722122-2722151 |                        |                   |        |     |
| <i>KCNQ1</i>      | NM_181798 | F-TTTGGGTGGTATTGTTGTAGGATTT         | Chr11: 2482191-2482215 | Chr11: 2482191-2482430 | 240               | +      | 7   |
|                   |           | R-CCTAATCACACCTAACCCATCACC          | Chr11: 2482407-2482430 |                        |                   |        |     |
| <i>PHLDA2</i>     | NM_003311 | F-GTAGTTYGTGGGTGGTAAGATAGGAGTT      | Chr11: 2951272-2951245 | Chr11: 2951272-2951065 | 208               | -      | 13  |
|                   |           | R-CCAAACCTTACCCTCCAAA               | Chr11: 2951084-2951065 |                        |                   |        |     |

<sup>a</sup> All genome coordinates are based on the human genome version GRCh37/hg19.

**Table S3.** Differential methylation of 16 CpG sites of imprinted genes associated with the risk of breast cancer in TCGA and GEO datasets.

| CpG        | Gene symbol     | Chromosome | Genomic coordinate | TCGA      |               | GSE51032      |        |         |              |               |        |
|------------|-----------------|------------|--------------------|-----------|---------------|---------------|--------|---------|--------------|---------------|--------|
|            |                 |            |                    | BC tissue | Normal tissue | $\Delta\beta$ | $p$    | BC PBLs | Control PBLs | $\Delta\beta$ | $p$    |
| cg18772071 | <i>NAP1L5</i>   | 4          | 89618324           | 0.490     | 0.441         | 0.049         | <0.001 | 0.557   | 0.541        | 0.016         | <0.001 |
| cg21740964 | <i>FAM50B</i>   | 6          | 3849331            | 0.540     | 0.574         | -0.034        | 0.011  | 0.518   | 0.529        | -0.011        | 0.012  |
| cg27589003 | <i>MEST</i>     | 7          | 130132286          | 0.467     | 0.427         | 0.040         | <0.001 | 0.485   | 0.469        | 0.016         | <0.001 |
| cg27120649 | <i>SGCE</i>     | 7          | 94286261           | 0.335     | 0.319         | 0.016         | 0.044  | 0.459   | 0.449        | 0.010         | 0.033  |
| cg01169624 | <i>SGCE</i>     | 7          | 94286936           | 0.593     | 0.640         | -0.047        | <0.001 | 0.672   | 0.685        | -0.013        | 0.008  |
| cg04402633 | <i>CDKN1C</i>   | 11         | 2907113            | 0.067     | 0.055         | 0.012         | <0.001 | 0.142   | 0.130        | 0.012         | <0.001 |
| cg11744767 | <i>CDKN1C</i>   | 11         | 2907672            | 0.404     | 0.232         | 0.172         | <0.001 | 0.315   | 0.304        | 0.011         | 0.019  |
| cg04975775 | <i>H19</i>      | 11         | 2019587            | 0.428     | 0.546         | -0.112        | <0.001 | 0.631   | 0.641        | -0.010        | 0.018  |
| cg15886040 | <i>H19</i>      | 11         | 2019606            | 0.538     | 0.594         | -0.056        | <0.001 | 0.659   | 0.671        | -0.012        | <0.001 |
| cg26709929 | <i>KCNQ1</i>    | 11         | 2482240            | 0.857     | 0.910         | -0.053        | <0.001 | 0.862   | 0.872        | -0.010        | <0.001 |
| cg08446215 | <i>KCNQ1OT1</i> | 11         | 2721366            | 0.540     | 0.551         | -0.011        | 0.031  | 0.672   | 0.682        | -0.010        | <0.001 |
| cg25306939 | <i>KCNQ1OT1</i> | 11         | 2722086            | 0.510     | 0.537         | -0.027        | 0.037  | 0.588   | 0.598        | -0.010        | 0.014  |
| cg16057921 | <i>PHLDA2</i>   | 11         | 2951168            | 0.058     | 0.046         | 0.012         | <0.001 | 0.150   | 0.134        | 0.016         | <0.001 |
| cg14245102 | <i>MEG3</i>     | 14         | 101292967          | 0.678     | 0.446         | 0.232         | <0.001 | 0.559   | 0.539        | 0.020         | <0.001 |
| cg09596866 | <i>ZNF597</i>   | 16         | 3493336            | 0.322     | 0.279         | 0.043         | <0.001 | 0.510   | 0.490        | 0.019         | 0.007  |
| cg12054318 | <i>GNASAS</i>   | 20         | 57414529           | 0.485     | 0.547         | -0.062        | <0.001 | 0.606   | 0.629        | -0.023        | <0.001 |

BC, breast cancer; PBLs, peripheral blood leukocytes, TCGA, The Cancer Genome Atlas; GEO, Gene Expression Omnibus.  $\Delta\beta$  represented the mean difference in methylation between BC tissues and normal tissues from TCGA, and between BC PBLs and control PBLs from GEO dataset (GSE51032).

**Table S4.** Demographic characteristics of breast cancer patients and controls for *KCNQ1* region sequencing.

| Characteristics                              | Case (%)    | Control (%)  | <i>p</i> |
|----------------------------------------------|-------------|--------------|----------|
| Number of participants                       | 494 (48.5)  | 525 (51.5)   |          |
| Age (year) <sup>a, b</sup>                   | 52.0 (9.36) | 52.1 (10.80) | 0.939    |
| <50                                          | 208 (42.2)  | 235 (44.8)   | 0.002    |
| 50-                                          | 184 (37.2)  | 142 (27.0)   |          |
| 60-                                          | 84 (17.0)   | 120 (22.9)   |          |
| ≥70                                          | 18 (3.6)    | 28 (5.3)     |          |
| BMI (kg/m <sup>2</sup> ) <sup>a, b</sup>     | 23.9 (3.64) | 23.7 (4.11)  | 0.373    |
| <18.5                                        | 15 (3.0)    | 27 (5.1)     | 0.332    |
| 18.5-                                        | 257 (52.0)  | 266 (50.7)   |          |
| 24-                                          | 133 (26.9)  | 133 (26.9)   |          |
| ≥28                                          | 89 (18.1)   | 89 (18.0)    |          |
| Ethnicity <sup>b</sup>                       |             |              | 0.279    |
| Han                                          | 482 (97.6)  | 505 (96.2)   |          |
| Other                                        | 12 (2.4)    | 20 (3.8)     |          |
| Location <sup>b</sup>                        |             |              | 0.484    |
| City                                         | 400 (81.0)  | 435 (82.9)   |          |
| Rural area                                   | 94 (19.0)   | 90 (17.1)    |          |
| Family history of other cancer <sup>b</sup>  |             |              | 0.001    |
| No                                           | 377 (76.3)  | 445 (84.8)   |          |
| Yes                                          | 117 (23.7)  | 80 (15.2)    |          |
| Family history of breast cancer <sup>b</sup> |             |              | <0.001   |
| No                                           | 456 (92.3)  | 517 (98.5)   |          |
| Yes                                          | 38 (7.7)    | 8 (1.5)      |          |

<sup>a</sup> mean (standard deviation), <sup>b</sup> n (%).

**Table S5.** Demographic characteristics of breast cancer patients and controls for *KCNQ1OT1* region 1 sequencing.

| Characteristics                              | Case (%)    | Control (%)  | <i>p</i> |
|----------------------------------------------|-------------|--------------|----------|
| Number of participants                       | 510 (48.9)  | 533 (51.1)   |          |
| Age (year) <sup>a, b</sup>                   | 52.0 (9.35) | 52.1 (10.75) | 0.925    |
| <50                                          | 214 (42.0)  | 237 (44.5)   | 0.004    |
| 50-                                          | 190 (37.3)  | 147 (27.6)   |          |
| 60-                                          | 88 (17.3)   | 121 (22.7)   |          |
| ≥70                                          | 18 (3.4)    | 28 (5.3)     |          |
| BMI (kg/m <sup>2</sup> ) <sup>a, b</sup>     | 23.9 (3.66) | 23.7 (4.10)  | 0.363    |
| <18.5                                        | 15 (2.9)    | 27 (5.1)     | 0.327    |
| 18.5-                                        | 269 (52.7)  | 271 (50.8)   |          |
| 24-                                          | 134 (26.3)  | 133 (25.0)   |          |
| ≥28                                          | 92 (18.0)   | 102 (19.1)   |          |
| Ethnicity <sup>b</sup>                       |             |              | 0.198    |
| Han                                          | 498 (97.6)  | 512 (96.1)   |          |
| Other                                        | 12 (2.4)    | 21 (3.9)     |          |
| Location <sup>b</sup>                        |             |              | 0.512    |
| City                                         | 414 (81.2)  | 442 (82.9)   |          |
| Rural area                                   | 96 (18.8)   | 91 (17.1)    |          |
| Family history of other cancer <sup>b</sup>  |             |              | <0.001   |
| No                                           | 388 (76.1)  | 453 (85.0)   |          |
| Yes                                          | 122 (23.9)  | 80 (15.0)    |          |
| Family history of breast cancer <sup>b</sup> |             |              | <0.001   |
| No                                           | 470 (92.2)  | 525 (98.5)   |          |
| Yes                                          | 40 (7.8)    | 8 (1.5)      |          |

<sup>a</sup> mean (standard deviation), <sup>b</sup> n (%).

**Table S6.** Demographic characteristics of breast cancer patients and controls for *KCNQ1OT1* region 2 sequencing.

| Characteristics                              | Case (%)    | Control (%)  | <i>p</i> |
|----------------------------------------------|-------------|--------------|----------|
| Number of participants                       | 354 (53.4)  | 309 (46.6)   |          |
| Age (year) <sup>a, b</sup>                   | 52.2 (9.44) | 52.3 (10.94) | 0.869    |
| <50                                          | 147 (41.5)  | 139 (45.0)   | 0.092    |
| 50-                                          | 128 (36.2)  | 86 (27.8)    |          |
| 60-                                          | 64 (18.1)   | 63 (20.4)    |          |
| ≥70                                          | 15 (4.2)    | 21 (6.8)     |          |
| BMI (kg/m <sup>2</sup> ) <sup>a, b</sup>     | 23.8 (3.54) | 23.7 (4.38)  | 0.814    |
| <18.5                                        | 12 (3.4)    | 15 (4.9)     | 0.389    |
| 18.5-                                        | 182 (51.4)  | 163 (52.8)   |          |
| 24-                                          | 98 (27.7)   | 70 (22.6)    |          |
| ≥28                                          | 62 (17.5)   | 61 (19.7)    |          |
| Ethnicity <sup>b</sup>                       |             |              | 0.790    |
| Han                                          | 347 (98.0)  | 301 (97.4)   |          |
| Other                                        | 7 (2.0)     | 8 (2.6)      |          |
| Location <sup>b</sup>                        |             |              | 0.761    |
| City                                         | 289 (81.6)  | 256 (82.8)   |          |
| Rural area                                   | 65 (18.4)   | 53 (17.2)    |          |
| Family history of other cancer <sup>b</sup>  |             |              | 0.003    |
| No                                           | 274 (77.4)  | 268 (86.7)   |          |
| Yes                                          | 80 (22.6)   | 41 (13.3)    |          |
| Family history of breast cancer <sup>b</sup> |             |              | <0.001   |
| No                                           | 330 (93.2)  | 307 (99.4)   |          |
| Yes                                          | 24 (6.8)    | 2 (0.6)      |          |

<sup>a</sup> mean (standard deviation), <sup>b</sup> n (%).

**Table S7.** Demographic characteristics of breast cancer patients and controls for *PHLDA2* region sequencing.

| Characteristics                              | Case (%)    | Control (%)  | <i>p</i> |
|----------------------------------------------|-------------|--------------|----------|
| Number of participants                       | 501 (48.6)  | 529 (51.4)   |          |
| Age (year) <sup>a, b</sup>                   | 52.0 (9.35) | 52.1 (10.79) | 0.920    |
| <50                                          | 211 (42.1)  | 236 (44.6)   | 0.004    |
| 50-                                          | 186 (37.1)  | 145 (27.4)   |          |
| 60-                                          | 86 (17.2)   | 120 (22.7)   |          |
| ≥70                                          | 18 (3.6)    | 28 (5.3)     |          |
| BMI (kg/m <sup>2</sup> ) <sup>a, b</sup>     | 23.9 (3.67) | 23.7 (4.09)  | 0.367    |
| <18.5                                        | 15 (3.0)    | 26 (4.9)     | 0.410    |
| 18.5-                                        | 261 (52.1)  | 270 (51.0)   |          |
| 24-                                          | 134 (26.7)  | 132 (25.0)   |          |
| ≥28                                          | 91 (18.2)   | 101 (19.1)   |          |
| Ethnicity <sup>b</sup>                       |             |              | 0.209    |
| Han                                          | 489 (97.6)  | 508 (96.0)   |          |
| Other                                        | 12 (2.4)    | 21 (4.0)     |          |
| Location <sup>b</sup>                        |             |              | 0.570    |
| City                                         | 408 (81.4)  | 439 (83.0)   |          |
| Rural area                                   | 93 (18.6)   | 90 (17.0)    |          |
| Family history of other cancer <sup>b</sup>  |             |              | 0.001    |
| No                                           | 383 (76.4)  | 449 (84.9)   |          |
| Yes                                          | 118 (23.6)  | 80 (15.1)    |          |
| Family history of breast cancer <sup>b</sup> |             |              | <0.001   |
| No                                           | 462 (92.2)  | 521 (98.5)   |          |
| Yes                                          | 39 (7.8)    | 8 (1.5)      |          |

<sup>a</sup> mean (standard deviation), <sup>b</sup> n (%).



**Table S8.** The association between the methylation of CpG sites on *KCNQ1* and the risk of breast cancer.

| CpG_Position                       | $\Delta\beta$ | <i>p</i> (t-test) | Univariate analysis |          | Multivariate analysis    |          |
|------------------------------------|---------------|-------------------|---------------------|----------|--------------------------|----------|
|                                    |               |                   | OR (95% CI)         | <i>p</i> | OR (95% CI) <sup>a</sup> | <i>p</i> |
| <i>KCNQ1</i> _2482223              | -0.001        | 0.267             | 0.921 (0.773-1.052) | 0.289    | 0.913 (0.764-1.045)      | 0.249    |
| <i>KCNQ1</i> _2482233              | -0.001        | 0.029             | 0.871 (0.768-0.985) | 0.029    | 0.870 (0.765-0.989)      | 0.033    |
| <i>KCNQ1</i> _2482240 <sup>b</sup> | -0.002        | 0.049             | 0.859 (0.731-0.990) | 0.048    | 0.852 (0.723-0.985)      | 0.047    |
| <i>KCNQ1</i> _2482284              | -0.003        | 0.129             | 0.909 (0.803-1.028) | 0.129    | 0.907 (0.797-1.030)      | 0.134    |
| <i>KCNQ1</i> _2482303              | -0.002        | 0.357             | 0.944 (0.834-1.067) | 0.356    | 0.938 (0.825-1.066)      | 0.329    |
| <i>KCNQ1</i> _2482394              | -0.001        | 0.499             | 0.958 (0.842-1.085) | 0.504    | 0.950 (0.831-1.079)      | 0.431    |
| <i>KCNQ1</i> _2482401              | -0.001        | 0.532             | 0.961 (0.849-1.087) | 0.530    | 0.948 (0.833-1.077)      | 0.411    |

OR, odds ratio; 95% CI, 95% confidence intervals.  $\Delta\beta$  represented the mean difference in methylation between breast cancer patients and controls from the validation dataset, and the ORs were calculated based on the methylation levels of CpG sites increased per standard deviation.

<sup>a</sup> ORs adjusted for age, BMI, race, location, family history of other cancer and family history of breast cancer.

<sup>b</sup> CpG site corresponding to cg26709929.

**Table S9.** The association between the methylation of CpG sites on *KCNQ1OT1* region 1 and the risk of breast cancer.

| CpG_Position                          | $\Delta\beta$ | <i>p</i> (t-test) | Univariate analysis |          | Multivariate analysis    |          |
|---------------------------------------|---------------|-------------------|---------------------|----------|--------------------------|----------|
|                                       |               |                   | OR (95% CI)         | <i>p</i> | OR (95% CI) <sup>a</sup> | <i>p</i> |
| <i>KCNQ1OT1</i> _2721321              | -0.001        | 0.835             | 0.987 (0.874-1.115) | 0.835    | 0.981 (0.867-1.111)      | 0.766    |
| <i>KCNQ1OT1</i> _2721324              | -0.001        | 0.631             | 0.971 (0.859-1.096) | 0.632    | 0.969 (0.855-1.096)      | 0.614    |
| <i>KCNQ1OT1</i> _2721336              | -0.001        | 0.725             | 0.978 (0.866-1.105) | 0.726    | 0.972 (0.858-1.100)      | 0.654    |
| <i>KCNQ1OT1</i> _2721351              | -0.001        | 0.787             | 0.983 (0.870-1.111) | 0.787    | 0.978 (0.864-1.107)      | 0.728    |
| <i>KCNQ1OT1</i> _2721366 <sup>b</sup> | -0.001        | 0.824             | 0.986 (0.873-1.114) | 0.824    | 0.980 (0.865-1.109)      | 0.747    |
| <i>KCNQ1OT1</i> _2721383              | -0.001        | 0.604             | 0.968 (0.857-1.093) | 0.604    | 0.964 (0.850-1.090)      | 0.558    |
| <i>KCNQ1OT1</i> _2721409              | -0.001        | 0.581             | 0.966 (0.855-1.091) | 0.581    | 0.962 (0.849-1.089)      | 0.539    |
| <i>KCNQ1OT1</i> _2721428              | -0.002        | 0.399             | 0.949 (0.839-1.072) | 0.399    | 0.946 (0.835-1.071)      | 0.384    |
| <i>KCNQ1OT1</i> _2721437              | -0.002        | 0.357             | 0.944 (0.835-1.067) | 0.358    | 0.943 (0.832-1.067)      | 0.353    |
| <i>KCNQ1OT1</i> _2721440              | -0.002        | 0.374             | 0.946 (0.837-1.069) | 0.375    | 0.945 (0.833-1.069)      | 0.369    |

OR, odds ratio; 95% CI, 95% confidence intervals.  $\Delta\beta$  represented the mean difference in methylation between breast cancer patients and controls from the validation dataset, and the ORs were calculated based on the methylation levels of CpG sites increased per standard deviation.

<sup>a</sup> ORs adjusted for age, BMI, race, location, family history of other cancer and family history of breast cancer.

<sup>b</sup> CpG site corresponding to cg08446215.

**Table S10.** The association between the methylation of CpG sites on *PHLDA2* region and the risk of breast cancer.

| CpG_Position                        | $\Delta\beta$ | $p$ (t-test) | Univariate analysis |       | Multivariate analysis    |       |
|-------------------------------------|---------------|--------------|---------------------|-------|--------------------------|-------|
|                                     |               |              | OR (95% CI)         | $p$   | OR (95% CI) <sup>a</sup> | $p$   |
| <i>PHLDA2</i> _2951086              | 0.001         | 0.548        | 1.038 (0.919-1.174) | 0.548 | 1.050 (0.929-1.193)      | 0.421 |
| <i>PHLDA2</i> _2951106              | 0.001         | 0.463        | 1.047 (0.927-1.184) | 0.461 | 1.040 (0.915-1.177)      | 0.564 |
| <i>PHLDA2</i> _2951112              | 0.001         | 0.648        | 1.029 (0.910-1.164) | 0.647 | 1.040 (0.916-1.176)      | 0.563 |
| <i>PHLDA2</i> _2951120              | 0.001         | 0.355        | 1.059 (0.937-1.198) | 0.355 | 1.060 (0.931-1.197)      | 0.397 |
| <i>PHLDA2</i> _2951137              | 0.001         | 0.040        | 1.139 (1.007-1.293) | 0.041 | 1.150 (1.010-1.300)      | 0.036 |
| <i>PHLDA2</i> _2951158              | 0.001         | 0.419        | 1.052 (0.931-1.190) | 0.419 | 1.060 (0.934-1.201)      | 0.374 |
| <i>PHLDA2</i> _2951168 <sup>b</sup> | 0.002         | 0.034        | 1.144 (1.011-1.298) | 0.035 | 1.140 (1.010-1.300)      | 0.041 |
| <i>PHLDA2</i> _2951174              | 0.001         | 0.646        | 1.029 (0.911-1.163) | 0.645 | 1.020 (0.898-1.155)      | 0.779 |
| <i>PHLDA2</i> _2951183              | 0.001         | 0.889        | 1.009 (0.893-1.140) | 0.888 | 1.000 (0.884-1.135)      | 0.980 |
| <i>PHLDA2</i> _2951202              | -0.001        | 0.994        | 1.000 (0.884-1.130) | 0.994 | 1.020 (0.901-1.158)      | 0.744 |
| <i>PHLDA2</i> _2951219              | -0.004        | 0.235        | 0.928 (0.820-1.049) | 0.234 | 0.935 (0.825-1.059)      | 0.293 |
| <i>PHLDA2</i> _2951239              | -0.001        | 0.659        | 0.973 (0.860-1.099) | 0.659 | 0.988 (0.872-1.119)      | 0.849 |
| <i>PHLDA2</i> _2951244              | -0.001        | 0.787        | 0.983 (0.870-1.111) | 0.787 | 0.996 (0.879-1.129)      | 0.947 |

OR, odds ratio; 95% CI, 95% confidence intervals.  $\Delta\beta$  represented the mean difference in methylation between breast cancer patients and controls from the validation dataset, and the ORs were calculated based on the methylation levels of CpG sites increased per standard deviation.

<sup>a</sup> ORs adjusted for age, BMI, race, location, family history of other cancer and family history of breast cancer.

<sup>b</sup> CpG site corresponding to cg16057921.

**Table S11.** Detail information of cut-off value of each detected CpG sites.

| <b>CpG_Position</b>      | <b>Cut-off value</b> | <b>AUC</b> | <b>Youden</b> |
|--------------------------|----------------------|------------|---------------|
| <i>KCNQ1</i> _2482233    | 0.961                | 0.473      | 0.018         |
| <i>KCNQ1</i> _2482240    | 0.940                | 0.527      | 0.065         |
| <i>KCNQ1OT1</i> _2721952 | 0.463                | 0.545      | 0.124         |
| <i>KCNQ1OT1</i> _2721955 | 0.475                | 0.548      | 0.137         |
| <i>KCNQ1OT1</i> _2721961 | 0.476                | 0.548      | 0.132         |
| <i>KCNQ1OT1</i> _2721966 | 0.473                | 0.546      | 0.129         |
| <i>KCNQ1OT1</i> _2721968 | 0.480                | 0.546      | 0.127         |
| <i>KCNQ1OT1</i> _2721978 | 0.475                | 0.550      | 0.145         |
| <i>KCNQ1OT1</i> _2721982 | 0.478                | 0.550      | 0.139         |
| <i>KCNQ1OT1</i> _2721986 | 0.470                | 0.547      | 0.136         |
| <i>KCNQ1OT1</i> _2721992 | 0.479                | 0.550      | 0.141         |
| <i>KCNQ1OT1</i> _2722019 | 0.471                | 0.545      | 0.127         |
| <i>KCNQ1OT1</i> _2722023 | 0.472                | 0.549      | 0.135         |
| <i>KCNQ1OT1</i> _2722036 | 0.480                | 0.548      | 0.131         |
| <i>KCNQ1OT1</i> _2722038 | 0.489                | 0.549      | 0.150         |
| <i>KCNQ1OT1</i> _2722045 | 0.471                | 0.549      | 0.141         |
| <i>KCNQ1OT1</i> _2722062 | 0.473                | 0.544      | 0.135         |
| <i>KCNQ1OT1</i> _2722071 | 0.479                | 0.546      | 0.128         |
| <i>KCNQ1OT1</i> _2722073 | 0.480                | 0.548      | 0.147         |
| <i>KCNQ1OT1</i> _2722076 | 0.482                | 0.549      | 0.134         |
| <i>KCNQ1OT1</i> _2722082 | 0.488                | 0.549      | 0.158         |
| <i>KCNQ1OT1</i> _2722084 | 0.484                | 0.544      | 0.139         |
| <i>KCNQ1OT1</i> _2722086 | 0.486                | 0.546      | 0.135         |
| <i>KCNQ1OT1</i> _2722119 | 0.458                | 0.567      | 0.151         |
| <i>PHLDA2</i> _2951168   | 0.071                | 0.540      | 0.094         |
| <i>PHLDA2</i> _2951137   | 0.028                | 0.530      | 0.097         |
| <i>KCNQ1OT1</i> region   | 0.474                | 0.551      | 0.150         |

AUC, area under curve. The optimal cut-off values of methylation level were calculated using the receiver operating characteristic curve.

**Table S12.** The association between methylation of CpG sites on *KCNQ1* region, *KCNQ1OT1* region 2, and *PHLDA2* region and the risk of breast cancer.

| CpG_Position             |        | Case (%)   | Control (%) | Univariate analysis |          | Multivariate analysis    |          |
|--------------------------|--------|------------|-------------|---------------------|----------|--------------------------|----------|
|                          |        |            |             | OR (95% CI)         | <i>p</i> | OR (95% CI) <sup>a</sup> | <i>p</i> |
| <i>KCNQ1</i> _2482233    | <0.961 | 257 (52.0) | 278 (53.0)  | 1.000               | 0.767    | 1.000                    | 0.675    |
|                          | ≥0.961 | 237 (48.0) | 247 (47.0)  | 1.040 (0.812-1.328) |          | 1.060 (0.820-1.360)      |          |
| <i>KCNQ1</i> _2482240    | <0.940 | 221 (44.7) | 202 (38.5)  | 1.000               | 0.043    | 1.000                    | 0.090    |
|                          | ≥0.940 | 273 (55.3) | 323 (61.5)  | 0.773 (0.602-0.991) |          | 0.802 (0.621-1.035)      |          |
| <i>KCNQ1OT1</i> _2721952 | <0.463 | 242 (68.4) | 173 (56.0)  | 1.000               | 0.001    | 1.000                    | 0.002    |
|                          | ≥0.463 | 112 (31.6) | 136 (44.0)  | 0.589 (0.428-0.808) |          | 0.589 (0.424-0.816)      |          |
| <i>KCNQ1OT1</i> _2721955 | <0.475 | 256 (72.3) | 182 (58.9)  | 1.000               | <0.001   | 1.000                    | 0.001    |
|                          | ≥0.475 | 98 (27.7)  | 127 (41.1)  | 0.549 (0.396-0.758) |          | 0.555 (0.395-0.775)      |          |
| <i>KCNQ1OT1</i> _2721961 | <0.476 | 254 (71.8) | 182 (58.9)  | 1.000               | 0.001    | 1.000                    | 0.001    |
|                          | ≥0.476 | 100 (28.2) | 127 (41.1)  | 0.564 (0.408-0.779) |          | 0.562 (0.402-0.785)      |          |
| <i>KCNQ1OT1</i> _2721966 | <0.473 | 245 (69.2) | 174 (56.3)  | 1.000               | 0.001    | 1.000                    | 0.001    |
|                          | ≥0.473 | 109 (30.8) | 135 (43.7)  | 0.573 (0.416-0.788) |          | 0.569 (0.408-0.790)      |          |
| <i>KCNQ1OT1</i> _2721968 | <0.480 | 257 (72.6) | 186 (60.2)  | 1.000               | 0.001    | 1.000                    | 0.001    |
|                          | ≥0.480 | 97 (27.4)  | 123 (39.8)  | 0.571 (0.411-0.790) |          | 0.568 (0.405-0.795)      |          |
| <i>KCNQ1OT1</i> _2721978 | <0.475 | 254 (71.8) | 177 (57.3)  | 1.000               | <0.001   | 1.000                    | <0.001   |
|                          | ≥0.475 | 100 (28.2) | 132 (42.7)  | 0.528 (0.382-0.728) |          | 0.523 (0.373-0.729)      |          |
| <i>KCNQ1OT1</i> _2721982 | <0.478 | 261 (73.7) | 186 (60.2)  | 1.000               | <0.001   | 1.000                    | 0.001    |
|                          | ≥0.478 | 93 (26.3)  | 123 (39.8)  | 0.539 (0.387-0.747) |          | 0.553 (0.393-0.775)      |          |
| <i>KCNQ1OT1</i> _2721986 | <0.470 | 251 (70.9) | 178 (57.6)  | 1.000               | <0.001   | 1.000                    | <0.001   |
|                          | ≥0.470 | 103 (29.1) | 131 (42.4)  | 0.558 (0.404-0.768) |          | 0.552 (0.395-0.769)      |          |
| <i>KCNQ1OT1</i> _2721992 | <0.479 | 265 (74.9) | 188 (60.8)  | 1.000               | <0.001   | 1.000                    | <0.001   |
|                          | ≥0.479 | 89 (25.1)  | 121 (39.2)  | 0.522 (0.374-0.726) |          | 0.520 (0.368-0.732)      |          |

|                  |        |            |            |                     |        |                     |        |
|------------------|--------|------------|------------|---------------------|--------|---------------------|--------|
| KCNQ1OT1_2722019 | <0.471 | 239 (67.5) | 171 (55.3) | 1.000               | 0.001  | 1.000               | 0.002  |
|                  | ≥0.471 | 115 (32.5) | 138 (44.7) | 0.596 (0.434-0.817) |        | 0.592 (0.426-0.821) |        |
| KCNQ1OT1_2722023 | <0.472 | 239 (67.5) | 168 (54.4) | 1.000               | 0.001  | 1.000               | 0.001  |
|                  | ≥0.472 | 115 (32.5) | 141 (45.6) | 0.573 (0.418-0.785) |        | 0.562 (0.404-0.779) |        |
| KCNQ1OT1_2722036 | <0.480 | 247 (70.0) | 176 (57.0) | 1.000               | 0.001  | 1.000               | 0.001  |
|                  | ≥0.480 | 107 (30.0) | 133 (43.0) | 0.573 (0.418-0.785) |        | 0.575 (0.413-0.799) |        |
| KCNQ1OT1_2722038 | <0.489 | 270 (76.3) | 191 (61.8) | 1.000               | <0.001 | 1.000               | <0.001 |
|                  | ≥0.489 | 84 (23.7)  | 118 (38.2) | 0.504 (0.359-0.703) |        | 0.507 (0.357-0.716) |        |
| KCNQ1OT1_2722045 | <0.471 | 239 (67.5) | 167 (54.0) | 1.000               | <0.001 | 1.000               | <0.001 |
|                  | ≥0.471 | 115 (32.5) | 142 (46.0) | 0.566 (0.412-0.775) |        | 0.556 (0.401-0.770) |        |
| KCNQ1OT1_2722062 | <0.473 | 244 (68.9) | 172 (55.7) | 1.000               | <0.001 | 1.000               | <0.001 |
|                  | ≥0.473 | 110 (31.1) | 137 (44.3) | 0.566 (0.411-0.777) |        | 0.553 (0.397-0.768) |        |
| KCNQ1OT1_2722071 | <0.479 | 247 (69.8) | 177 (57.3) | 1.000               | 0.001  | 1.000               | 0.001  |
|                  | ≥0.479 | 107 (30.2) | 132 (42.7) | 0.581 (0.421-0.799) |        | 0.575 (0.413-0.800) |        |
| KCNQ1OT1_2722073 | <0.480 | 248 (70.1) | 171 (55.3) | 1.000               | <0.001 | 1.000               | <0.001 |
|                  | ≥0.480 | 106 (29.9) | 138 (44.7) | 0.530 (0.384-0.728) |        | 0.518 (0.371-0.719) |        |
| KCNQ1OT1_2722076 | <0.482 | 250 (70.6) | 178 (57.6) | 1.000               | 0.001  | 1.000               | 0.001  |
|                  | ≥0.482 | 104 (29.4) | 131 (42.4) | 0.565 (0.409-0.779) |        | 0.567 (0.406-0.789) |        |
| KCNQ1OT1_2722082 | <0.488 | 261 (73.7) | 179 (57.9) | 1.000               | <0.001 | 1.000               | <0.001 |
|                  | ≥0.488 | 93 (26.3)  | 130 (42.1) | 0.491 (0.353-0.680) |        | 0.489 (0.348-0.685) |        |
| KCNQ1OT1_2722084 | <0.484 | 253 (71.5) | 178 (57.6) | 1.000               | <0.001 | 1.000               | <0.001 |
|                  | ≥0.484 | 101 (28.5) | 131 (42.4) | 0.542 (0.392-0.748) |        | 0.531 (0.379-0.740) |        |
| KCNQ1OT1_2722086 | <0.486 | 254 (71.8) | 182 (58.9) | 1.000               | 0.001  | 1.000               | <0.001 |
|                  | ≥0.486 | 100 (28.2) | 127 (41.1) | 0.564 (0.408-0.779) |        | 0.549 (0.392-0.767) |        |
| KCNQ1OT1_2722119 | <0.458 | 254 (71.8) | 175 (56.6) | 1.000               | <0.001 | 1.000               | <0.001 |
|                  | ≥0.458 | 100 (28.2) | 134 (43.4) | 0.514 (0.372-0.709) |        | 0.517 (0.369-0.720) |        |

|                        |        |            |            |                     |       |                     |       |
|------------------------|--------|------------|------------|---------------------|-------|---------------------|-------|
| <i>PHLDA2</i> _2951168 | <0.071 | 305 (60.9) | 366 (69.2) | 1.000               | 0.005 | 1.000               | 0.009 |
|                        | ≥0.071 | 196 (39.1) | 163 (30.8) | 1.440 (1.120-1.870) |       | 1.420 (1.090-1.840) |       |
| <i>PHLDA2</i> _2951137 | <0.028 | 323 (64.5) | 389 (73.5) | 1.000               | 0.002 | 1.000               | 0.002 |
|                        | ≥0.028 | 178 (35.5) | 140 (26.5) | 1.531 (1.174-1.998) |       | 1.540 (1.180-2.020) |       |

OR, odds ratio; 95% CI, 95% confidence intervals.

<sup>a</sup> ORs were calculated based on the methylation levels of CpG sites increased per standard deviation, and were adjusted for age, BMI, race, location, family history of other cancer and family history of breast cancer.

**Table S13.** The association between methylation of cg26709929 on *KCNQ1* region and the risk of breast cancer in different subgroups.

| Subgroup          | KCNQ1_2482240 | Case (%)   | Control (%) | Univariate analysis |          | Multivariate analysis    |          |
|-------------------|---------------|------------|-------------|---------------------|----------|--------------------------|----------|
|                   |               |            |             | OR (95% CI)         | <i>p</i> | OR (95% CI) <sup>a</sup> | <i>p</i> |
| Age (year)        |               |            |             |                     |          |                          |          |
| <50               | <0.940        | 84 (40.4)  | 88 (37.4)   | 1.000               | 0.527    | 1.000                    | 0.849    |
|                   | ≥0.940        | 124 (59.6) | 147 (62.6)  | 0.884 (0.602-1.296) |          | 0.962 (0.645-1.436)      |          |
| ≥50               | <0.940        | 137 (47.9) | 114 (39.3)  | 1.000               | 0.038    | 1.000                    | 0.054    |
|                   | ≥0.940        | 149 (52.1) | 176 (60.7)  | 0.704 (0.506-0.980) |          | 0.720 (0.515-1.005)      |          |
| Molecular subtype |               |            |             |                     |          |                          |          |
| Luminal A         | <0.940        | 79 (46.2)  | 202 (38.5)  | 1.000               | 0.074    | 1.000                    | 0.119    |
|                   | ≥0.940        | 92 (53.8)  | 323 (61.5)  | 0.728 (0.514-1.033) |          | 0.755 (0.530-1.080)      |          |
| Luminal B         | <0.940        | 76 (41.8)  | 202 (38.5)  | 1.000               | 0.435    | 1.000                    | 0.621    |
|                   | ≥0.940        | 106 (58.2) | 323 (61.5)  | 0.872 (0.620-1.230) |          | 0.914 (0.641-1.308)      |          |
| HER-2             | <0.940        | 33 (53.2)  | 202 (38.5)  | 1.000               | 0.027    | 1.000                    | 0.036    |
|                   | ≥0.940        | 29 (46.8)  | 323 (61.5)  | 0.550 (0.322-0.932) |          | 0.559 (0.323-0.962)      |          |
| Basal-like        | <0.940        | 25 (45.5)  | 202 (38.5)  | 1.000               | 0.314    | 1.000                    | 0.470    |
|                   | ≥0.940        | 30 (54.5)  | 323 (61.5)  | 0.750 (0.430-1.320) |          | 0.810 (0.458-1.448)      |          |

OR, odds ratio; 95% CI, 95% confidence intervals.

<sup>a</sup> ORs were calculated based on the methylation levels of CpG sites increased per standard deviation, and were adjusted for age, BMI, race, location, family history of other cancer and family history of breast cancer.



**Table S14.** The association between methylation of the CpG located on genomic coordinate 2482233 in *KCNQ1* and the risk of breast cancer in different subgroups.

| Subgroup          | KCNQ1_2482233 | Case (%)   | Control (%) | Univariate analysis |          | Multivariate analysis    |          |
|-------------------|---------------|------------|-------------|---------------------|----------|--------------------------|----------|
|                   |               |            |             | OR (95% CI)         | <i>p</i> | OR (95% CI) <sup>a</sup> | <i>p</i> |
| Age (year)        |               |            |             |                     |          |                          |          |
| <50               | <0.961        | 99 (47.6)  | 112 (47.7)  | 1.000               | 0.989    | 1.000                    | 0.676    |
|                   | ≥0.961        | 109 (52.4) | 123 (52.3)  | 1.000 (0.690-1.460) |          | 1.090 (0.736-1.607)      |          |
| ≥50               | <0.961        | 158 (55.2) | 166 (57.2)  | 1.000               | 0.629    | 1.000                    | 0.644    |
|                   | ≥0.961        | 128 (44.8) | 124 (42.8)  | 1.080 (0.780-1.510) |          | 1.080 (0.776-1.508)      |          |
| Molecular subtype |               |            |             |                     |          |                          |          |
| Luminal A         | <0.961        | 97 (56.7)  | 278 (53.0)  | 1.000               | 0.368    | 1.000                    | 0.589    |
|                   | ≥0.961        | 74 (43.3)  | 247 (47.0)  | 0.859 (0.605-1.214) |          | 0.907 (0.635-1.293)      |          |
| Luminal B         | <0.961        | 80 (44.0)  | 278 (53.0)  | 1.000               | 0.037    | 1.000                    | 0.040    |
|                   | ≥0.961        | 102 (56.0) | 247 (47.0)  | 1.440 (1.020-2.020) |          | 1.450 (1.020-2.060)      |          |
| HER-2             | <0.961        | 36 (58.1)  | 278 (53.0)  | 1.000               | 0.446    | 1.000                    | 0.388    |
|                   | ≥0.961        | 26 (41.9)  | 247 (47.0)  | 0.813 (0.473-1.380) |          | 0.786 (0.451-1.352)      |          |
| Basal-like        | <0.961        | 32 (58.2)  | 278 (53.0)  | 1.000               | 0.460    | 1.000                    | 0.593    |
|                   | ≥0.961        | 23 (41.8)  | 247 (47.0)  | 0.809 (0.456-1.414) |          | 0.855 (0.478-1.512)      |          |

OR, odds ratio; 95% CI, 95% confidence intervals.

<sup>a</sup> ORs were calculated based on the methylation levels of CpG sites increased per standard deviation, and were adjusted for age, BMI, race, location, family history of other cancer and family history of breast cancer.

**Table S15.** The association between methylation of cg16057921 on *PHLDA2* region and the risk of breast cancer in different subgroups.

| Subgroup          | PHLDA2_2951168 | Case (%)   | Control (%) | Univariate analysis |          | Multivariate analysis    |          |
|-------------------|----------------|------------|-------------|---------------------|----------|--------------------------|----------|
|                   |                |            |             | OR (95% CI)         | <i>p</i> | OR (95% CI) <sup>a</sup> | <i>p</i> |
| Age (year)        |                |            |             |                     |          |                          |          |
| <50               | <0.071         | 131 (62.1) | 159 (67.4)  | 1.000               | 0.243    | 1.000                    | 0.482    |
|                   | ≥0.071         | 80 (37.9)  | 77 (32.6)   | 1.260 (0.855-1.862) |          | 1.160 (0.770-1.740)      |          |
| ≥50               | <0.071         | 174 (60.0) | 207 (70.6)  | 1.000               | 0.007    | 1.000                    | 0.007    |
|                   | ≥0.071         | 116 (40.0) | 86 (29.4)   | 1.600 (1.140-2.270) |          | 1.610 (1.140-2.280)      |          |
| Molecular subtype |                |            |             |                     |          |                          |          |
| Luminal A         | <0.071         | 105 (61.4) | 366 (69.2)  | 1.000               | 0.060    | 1.000                    | 0.080    |
|                   | ≥0.071         | 66 (38.6)  | 163 (30.8)  | 1.410 (0.983-2.018) |          | 1.380 (0.959-1.988)      |          |
| Luminal B         | <0.071         | 113 (61.1) | 366 (69.2)  | 1.000               | 0.044    | 1.000                    | 0.046    |
|                   | ≥0.071         | 72 (38.9)  | 163 (30.8)  | 1.430 (1.010-2.020) |          | 1.440 (1.000-2.060)      |          |
| HER-2             | <0.071         | 42 (64.6)  | 366 (69.2)  | 1.000               | 0.454    | 1.000                    | 0.620    |
|                   | ≥0.071         | 23 (35.4)  | 163 (30.8)  | 1.230 (0.706-2.094) |          | 1.150 (0.650-1.990)      |          |
| Basal-like        | <0.071         | 29 (51.8)  | 366 (69.2)  | 1.000               | 0.009    | 1.000                    | 0.014    |
|                   | ≥0.071         | 27 (48.2)  | 163 (30.8)  | 2.090 (1.190-3.650) |          | 2.030 (1.150-3.560)      |          |

OR, odds ratio; 95% CI, 95% confidence intervals.

<sup>a</sup> ORs were calculated based on the methylation levels of CpG sites increased per standard deviation, and were adjusted for age, BMI, race, location, family history of other cancer and family history of breast cancer.

**Table S16.** The association between methylation of the CpG located on genomic coordinate 2951137 in *PHLDA2* region and the risk of breast cancer in different subgroups.

| Subgroup          | PHLDA2_2951137 | Case (%)   | Control (%) | Univariate analysis |          | Multivariate analysis    |          |
|-------------------|----------------|------------|-------------|---------------------|----------|--------------------------|----------|
|                   |                |            |             | OR (95% CI)         | <i>p</i> | OR (95% CI) <sup>1</sup> | <i>p</i> |
| Age (year)        |                |            |             |                     |          |                          |          |
| <50               | <0.028         | 140 (66.4) | 175 (74.2)  | 1.000               | 0.072    | 1.000                    | 0.101    |
|                   | ≥0.028         | 71 (33.6)  | 61 (25.8)   | 1.450 (0.968-2.192) |          | 1.430 (0.933-2.198)      |          |
| ≥50               | <0.028         | 183 (63.1) | 214 (73.0)  | 1.000               | 0.010    | 1.000                    | 0.009    |
|                   | ≥0.028         | 107 (36.9) | 79 (27.0)   | 1.580 (1.120-2.260) |          | 1.600 (1.130-2.290)      |          |
| Molecular subtype |                |            |             |                     |          |                          |          |
| Luminal A         | <0.028         | 111 (64.9) | 389 (73.5)  | 1.000               | 0.031    | 1.000                    | 0.033    |
|                   | ≥0.028         | 60 (35.1)  | 140 (26.5)  | 1.500 (1.040-2.170) |          | 1.500 (1.030-2.180)      |          |
| Luminal B         | <0.028         | 115 (62.2) | 389 (73.5)  | 1.000               | 0.004    | 1.000                    | 0.011    |
|                   | ≥0.028         | 70 (37.8)  | 140 (26.5)  | 1.690 (1.180-2.410) |          | 1.610 (1.110-2.320)      |          |
| HER-2             | <0.028         | 43 (66.2)  | 389 (73.5)  | 1.000               | 0.209    | 1.000                    | 0.247    |
|                   | ≥0.028         | 22 (33.8)  | 140 (26.5)  | 1.420 (0.809-2.437) |          | 1.400 (0.781-2.446)      |          |
| Basal-like        | <0.028         | 36 (64.3)  | 389 (73.5)  | 1.000               | 0.142    | 1.000                    | 0.118    |
|                   | ≥0.028         | 20 (35.7)  | 140 (26.5)  | 1.540 (0.851-2.730) |          | 1.600 (0.875-2.878)      |          |

OR, odds ratio; 95% CI, 95% confidence intervals.

<sup>a</sup> ORs were calculated based on the methylation levels of CpG sites increased per standard deviation, and were adjusted for age, BMI, race, location, family history of other cancer and family history of breast cancer.

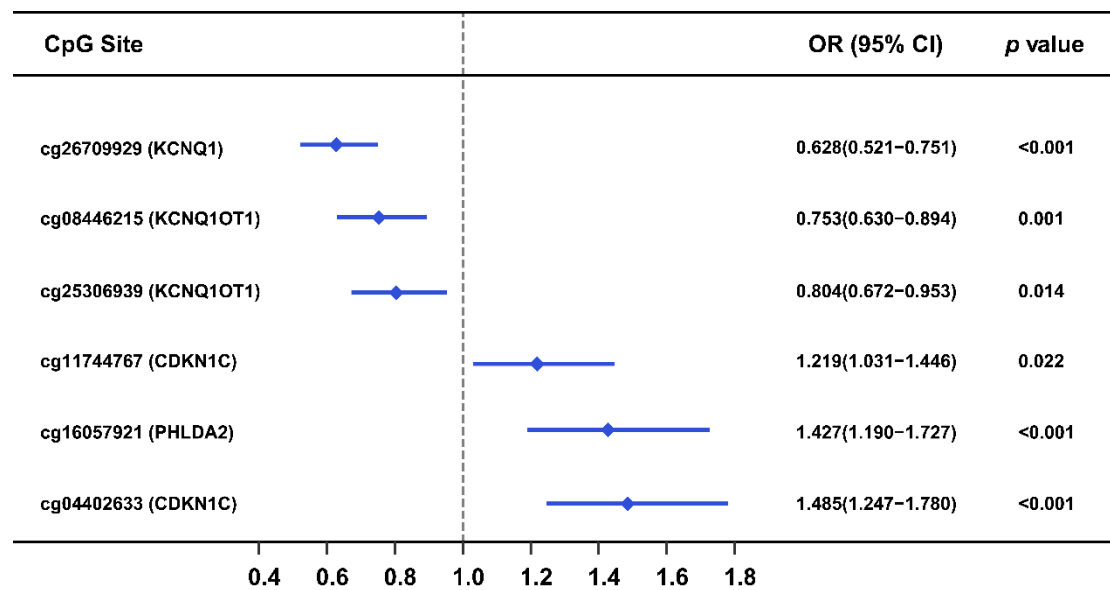

**Figure S1.** The association between 6 CpG sites of imprinted genes and the risk of breast cancer in GSE51032 dataset. OR, odds ratio; 95% CI, 95% confidence intervals. The forest plot showed the results of univariate logistic regression analyses of 6 CpG sites. ORs were calculated based on the increased methylation levels of CpG sites per standard deviation.

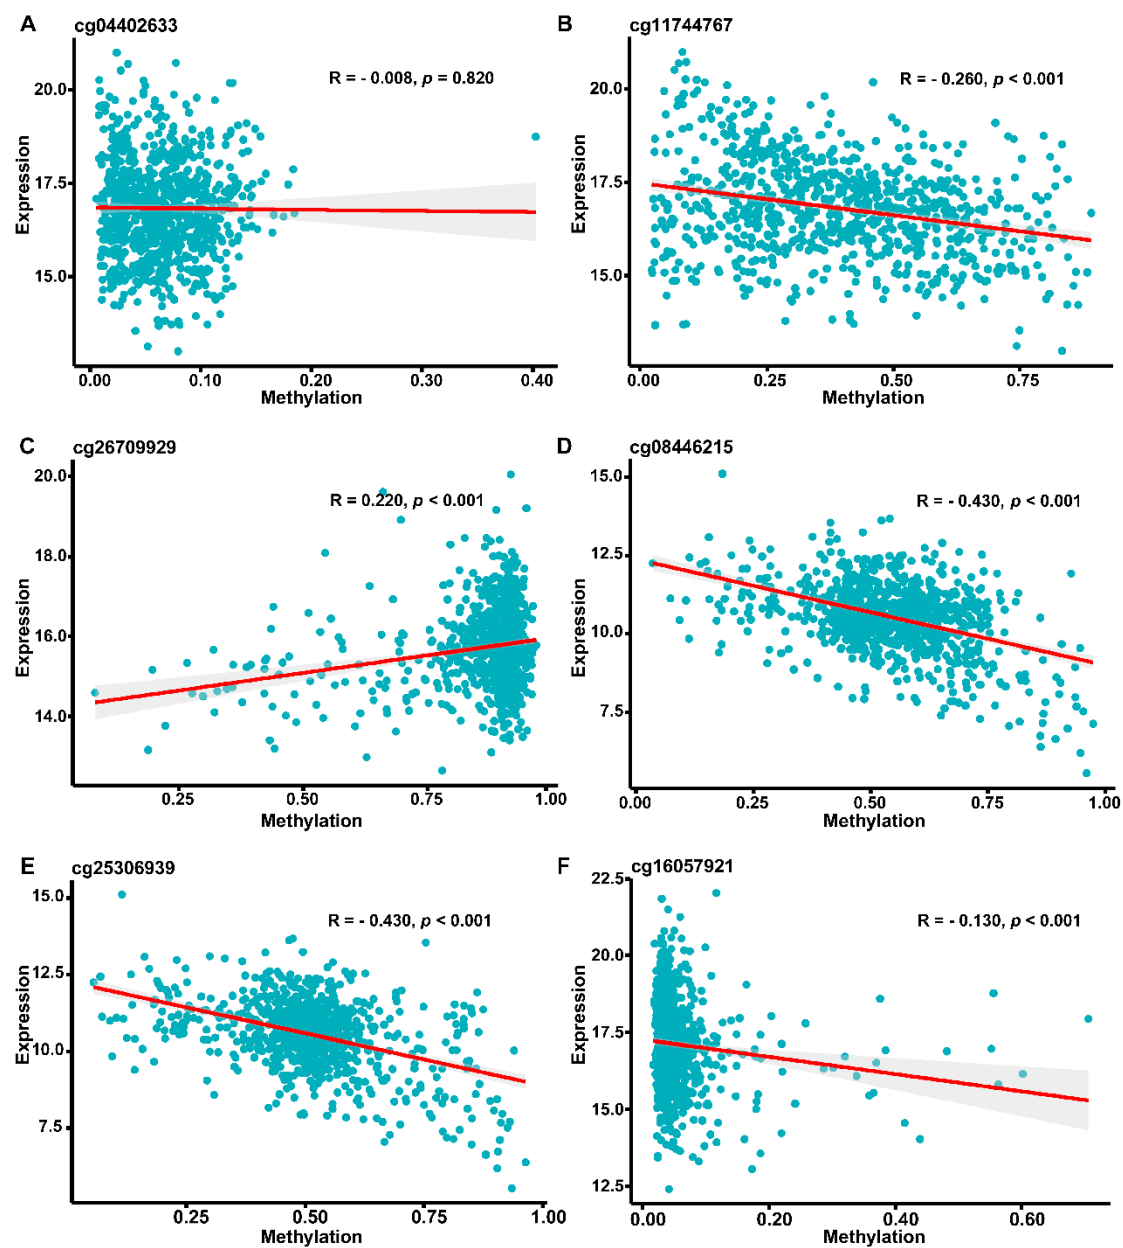

**Figure S2.** Correlation between methylation of 6 CpG sites and corresponding gene expression levels in TCGA dataset.

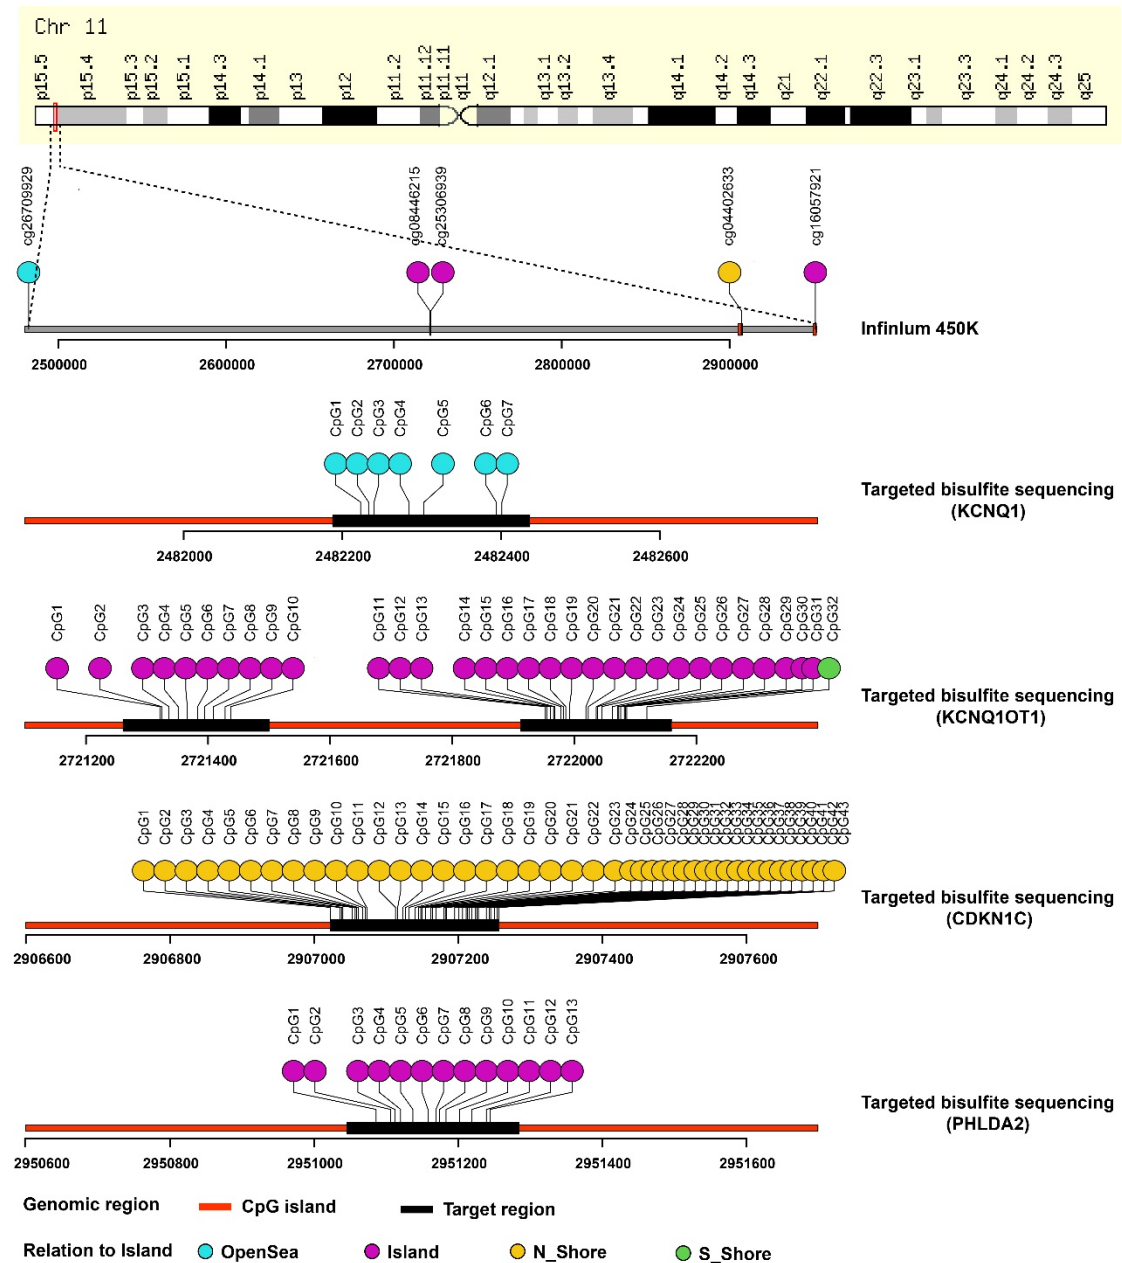

**Figure S3.** Target regions of imprinted genes for targeted bisulfite sequencing. In targeted bisulfite sequencing, five regions of *KCNQ1*, *KCNQ1OT1*, *CDKN1C*, and *PHLDA2* were amplified using primers designed based on the genomic location of cg26709929, cg08446215, cg25306939, cg04402633, and cg16057921. The target region of *KCNQ1* covered 7 CpG sites (CpG1 to CpG7), and CpG3 on *KCNQ1* region corresponded to cg26709929. The target region 1 of *KCNQ1OT1* covered 10 CpG sites (CpG1 to CpG10), and CpG5 on *KCNQ1OT1* region corresponded to cg08446215. The target region 2 of *KCNQ1OT1* covered 22 CpG sites (CpG11 to CpG32), and CpG31 on *KCNQ1OT1* region corresponded to cg25306939. The target region of *CDKN1C* covered 43 CpG sites (CpG1 to CpG43), and CpG12 on *CDKN1C* region corresponded to cg04402633. The target region of *PHLDA2* covered 13 CpG sites (CpG1 to CpG13), and CpG7 on *PHLDA2* region corresponded to cg16057921.

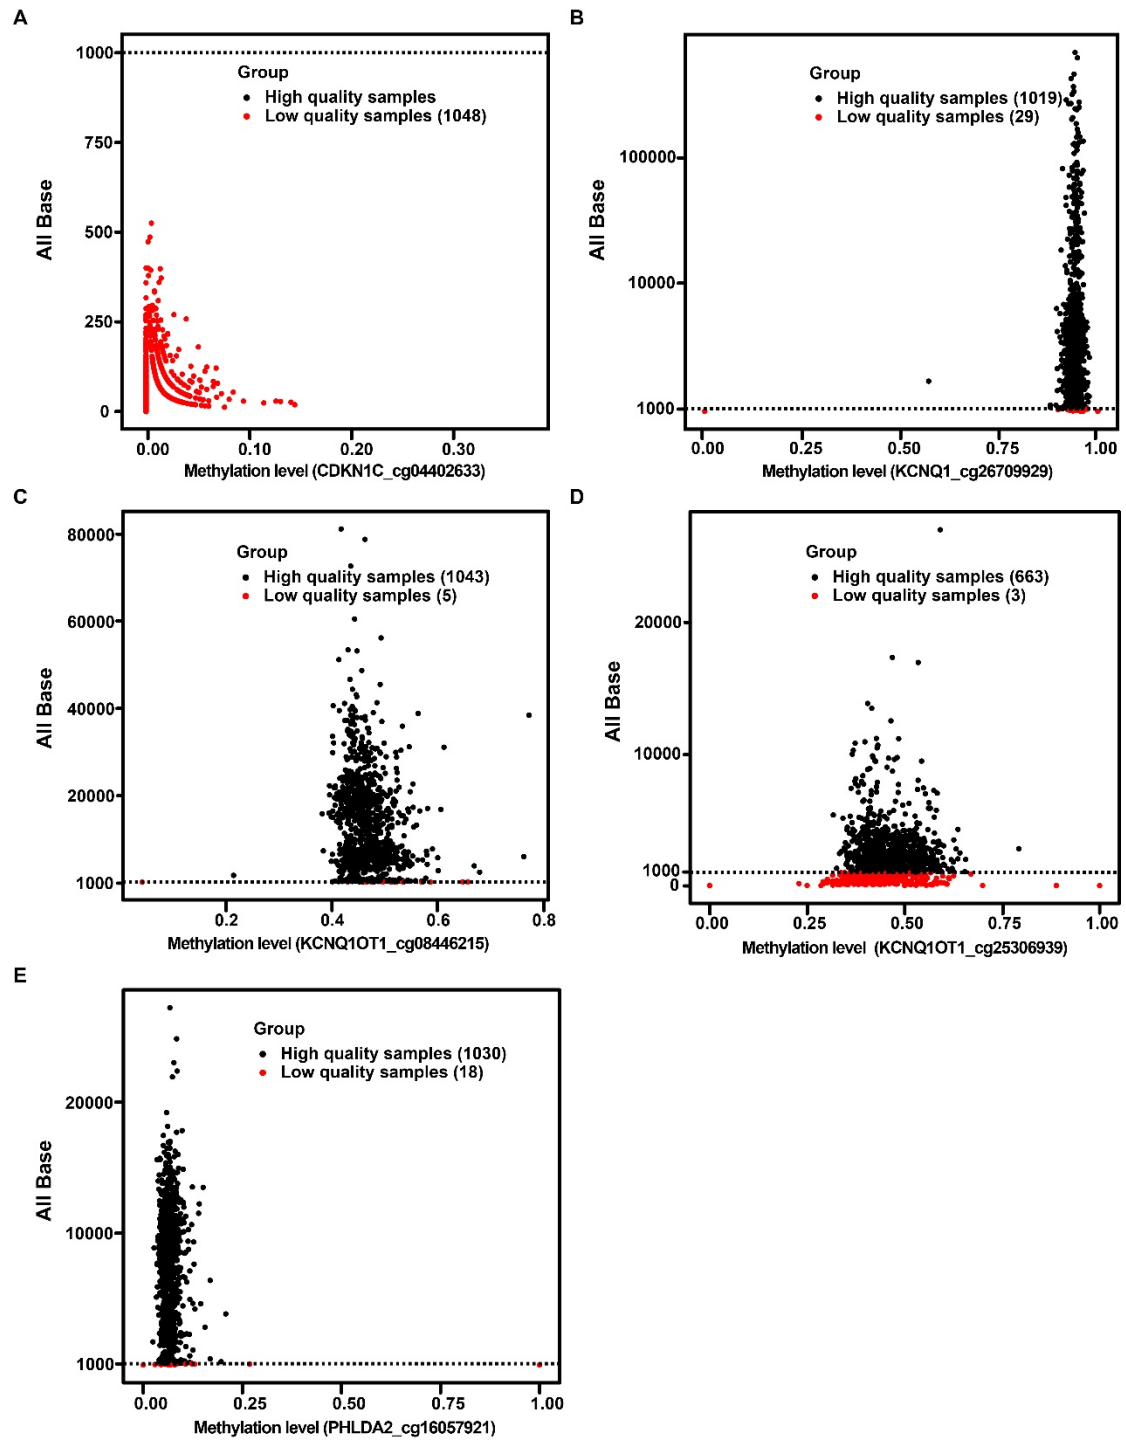

**Figure S4.** Quality control of samples based on different target regions. (A), (B), (C), (D), (E) represented the sequencing depth of cg04402633, cg26709929, cg08446215, cg25306939, and cg16057921 in targeted bisulfite sequencing, respectively.

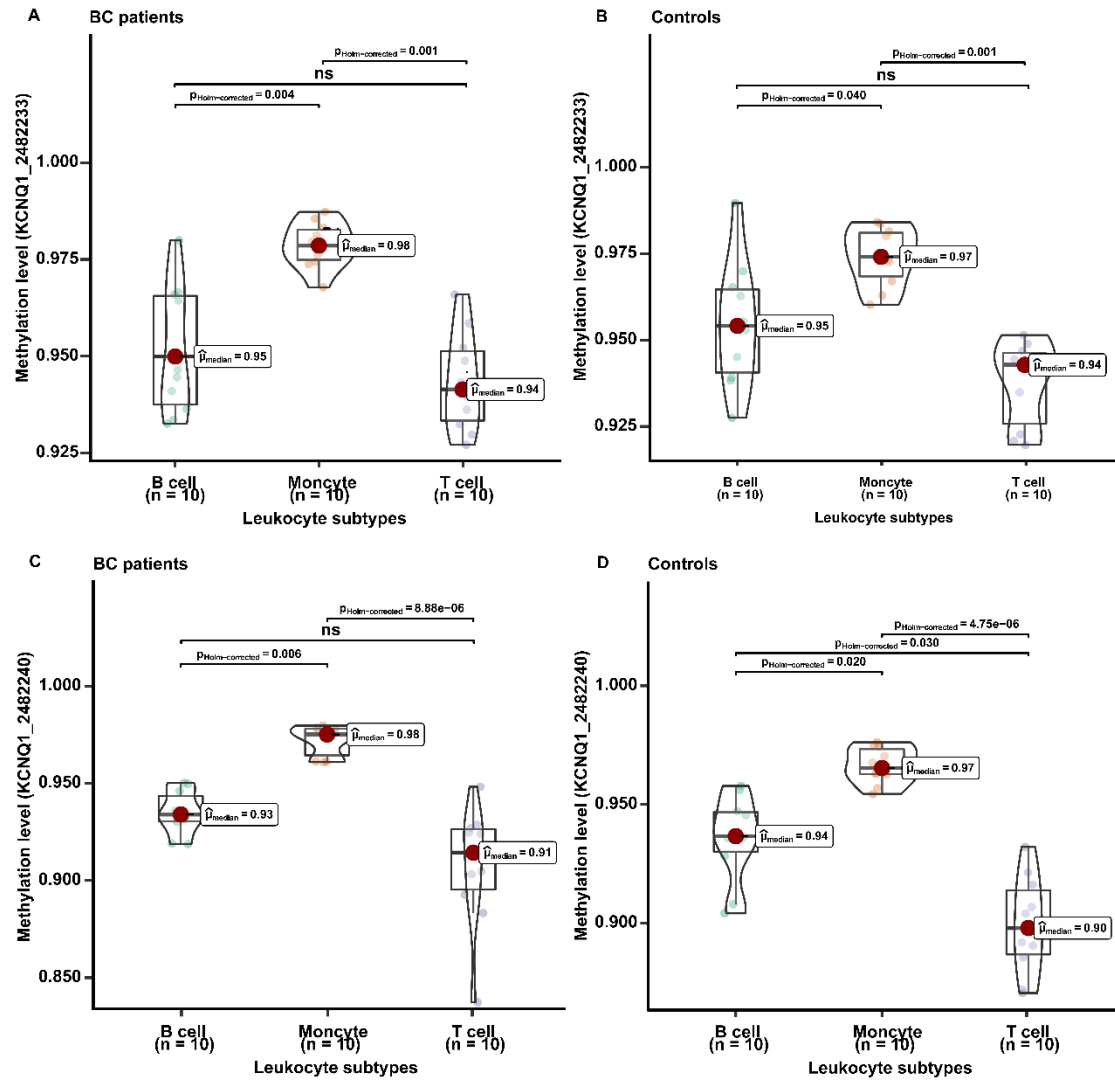

**Figure S5.** The methylation levels of the CpG located on genomic coordinate 2482233 and 2482240 in *KCNQ1* in T cells, monocytes, and B cells. The methylation level was measured in the samples (bisulfite-converted DNA from T cells, monocytes, and B cells) from 10 breast cancer patients and 10 healthy controls. The methylation levels between different leukocyte subtypes were compared by *Kruskal-Wallis* test.



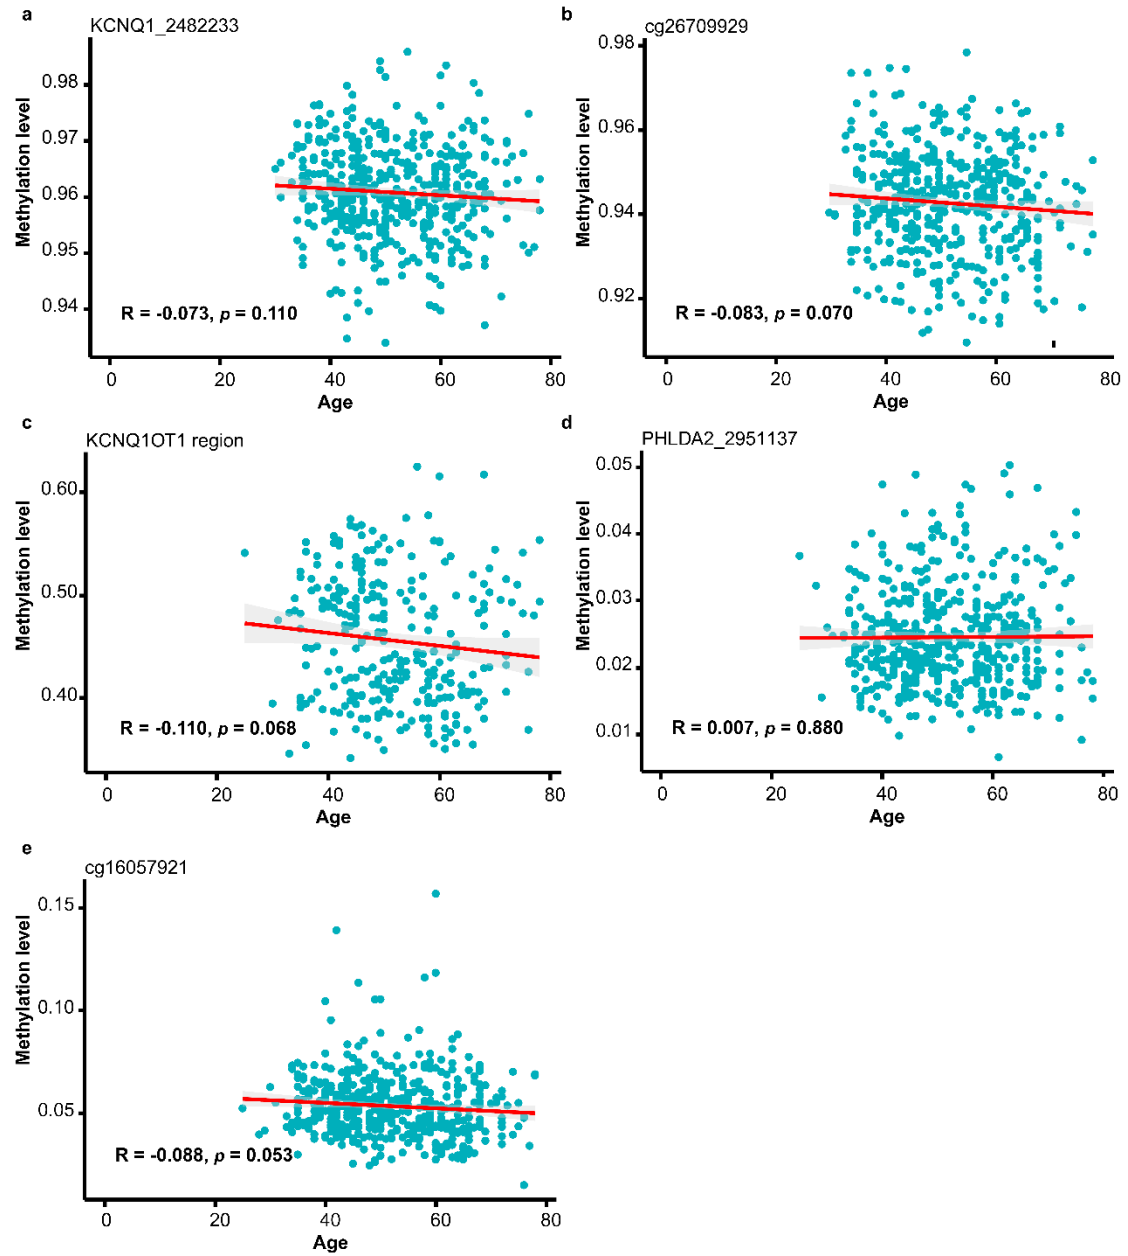

**Figure S6.** Correlation between methylation of *KCNQ1*, *KCNQ1OT1*, and *PHLDA2*, and the age of breast cancer-free individuals in the validation dataset.
